# Supplementary material
Source: PubMed Central journal article supplement (PMC7721358)
Supplement: EMMM-12-e13296-s001.pdf [file EMMM-12-e13296-s001.pdf]

## **Appendix**

### **SARS-CoV-2 outbreak investigation in a German meat processing plant**

Thomas Günther<sup>1§</sup>, Manja Czech-Sioli<sup>2</sup>, Daniela Indenbirken<sup>1</sup>, Alexis Robitaille<sup>1</sup>, Peter Tenhaken<sup>3</sup>, Martin Exner<sup>4</sup>, Matthias Ottinger<sup>5</sup>, Nicole Fischer<sup>2\*</sup>, Adam Grundhoff<sup>1§\*</sup>, Melanie M. Brinkmann<sup>6,7\*</sup>

#### **This PDF file includes:**

Appendix Figures S1 to S3  
Appendix Tables S1 to S6

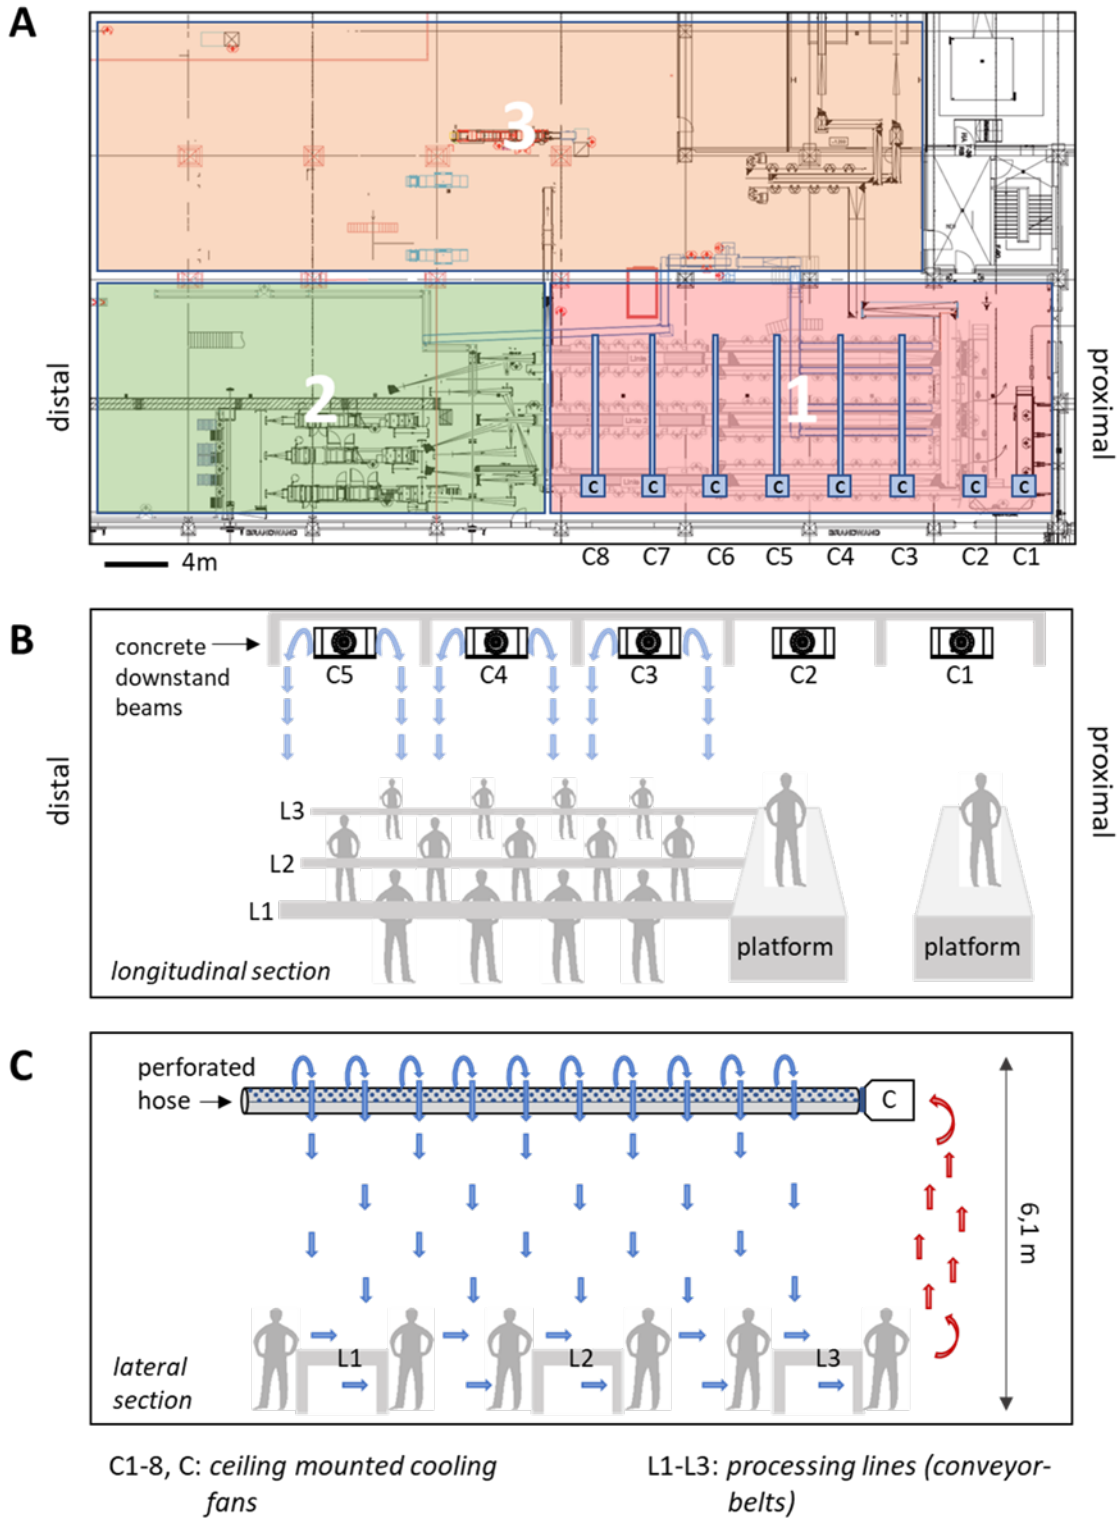

**Appendix Fig. S1. Schematic layout and air-flow conditions of beef processing plant in MPP-R.**

(A) Schematic layout of the beef processing plant. Beef halves enter the processing plant on the proximal side (area 1, red). In the section cooled by ceiling mounted cooling fans 1 (C1) and 2 (C2), beef halves are cut in quarters. Quarters are then translocated onto three processing lines (conveyor-belts, L1-3). L1-3 are moving in proximal-distal direction. Beef quarters are further processed in the section of cooling fans C3-5 (deboning), and finer cuts (shearing) are performed in section of cooling fans C6-8. Towards the distal part of the plant (area 2, green), the beef is packed into consumer packaging and packaging is sealed. Area 3 (orange) is used for weighing and packaging consumer units into boxes. Boxes are placed on pallets for shipping. Index case B1 worked in area 1 (red). Air conditioning units in area 1 are cooling recirculated air without filters (C1-8). C3-8 are connected to a perforated hose directed towards area 3 whereas C1 and C2 lack a hose. The air exchange rate value for the entire beef processing plant is  $<1$  (i.e., it takes more than one hour to replace the air). (B) Schematic longitudinal section in distal-proximal direction of area 1. Beef halves are cut on platforms in the section cooled by cooling fans C1 and C2. C1 and C2 are operating without hose and turn on only when temperatures rise above  $10^{\circ}\text{C}$ . Cooled air is expelled through the hall up to a lateral distance of approximately 12 meters. Cooling fans 3-8 are operating permanently and are expelling cooled air through attached perforated hoses. (C) Schematic cross-section in the axis of one cooling fan/perforated hose. Cooling fan is expelling cooled, recirculated, unfiltered air into attached hoses. Hoses are perforated in the upper half thereby expelling air towards the ceiling. Concrete down stand beams are guiding the cool air downwards. The resulting air flow is resembling a laminar flow of cooled air from ceiling to the working area at the level of the conveyor-belt processing lines.

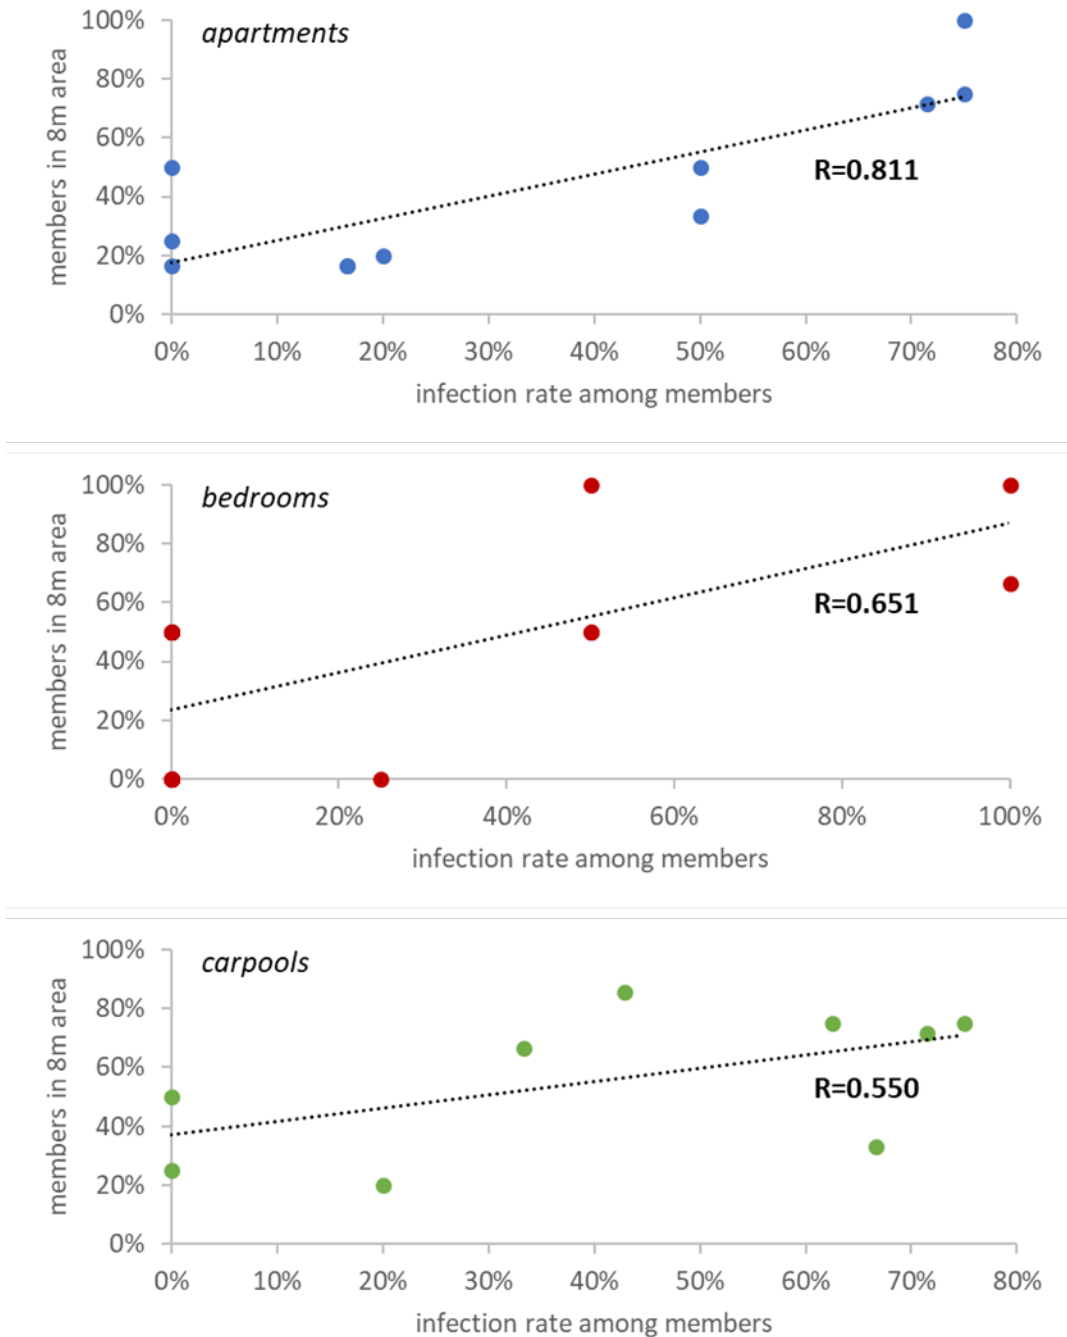

**Appendix Fig. S2. Positive correlation between infection rates and work location in shared apartments, bedrooms and carpools.**

For each apartment (top panel), bedroom (center panel) or carpool (bottom panel), plots show the percentage of positive unit members (x-axis) and the percentage unit members with fixed work stations in an 8 m area around the index case (y-axis). Individual values are given in Appendix Table SIII. Pearson correlation coefficients (R) are shown next to linear regression curves (dotted lines).

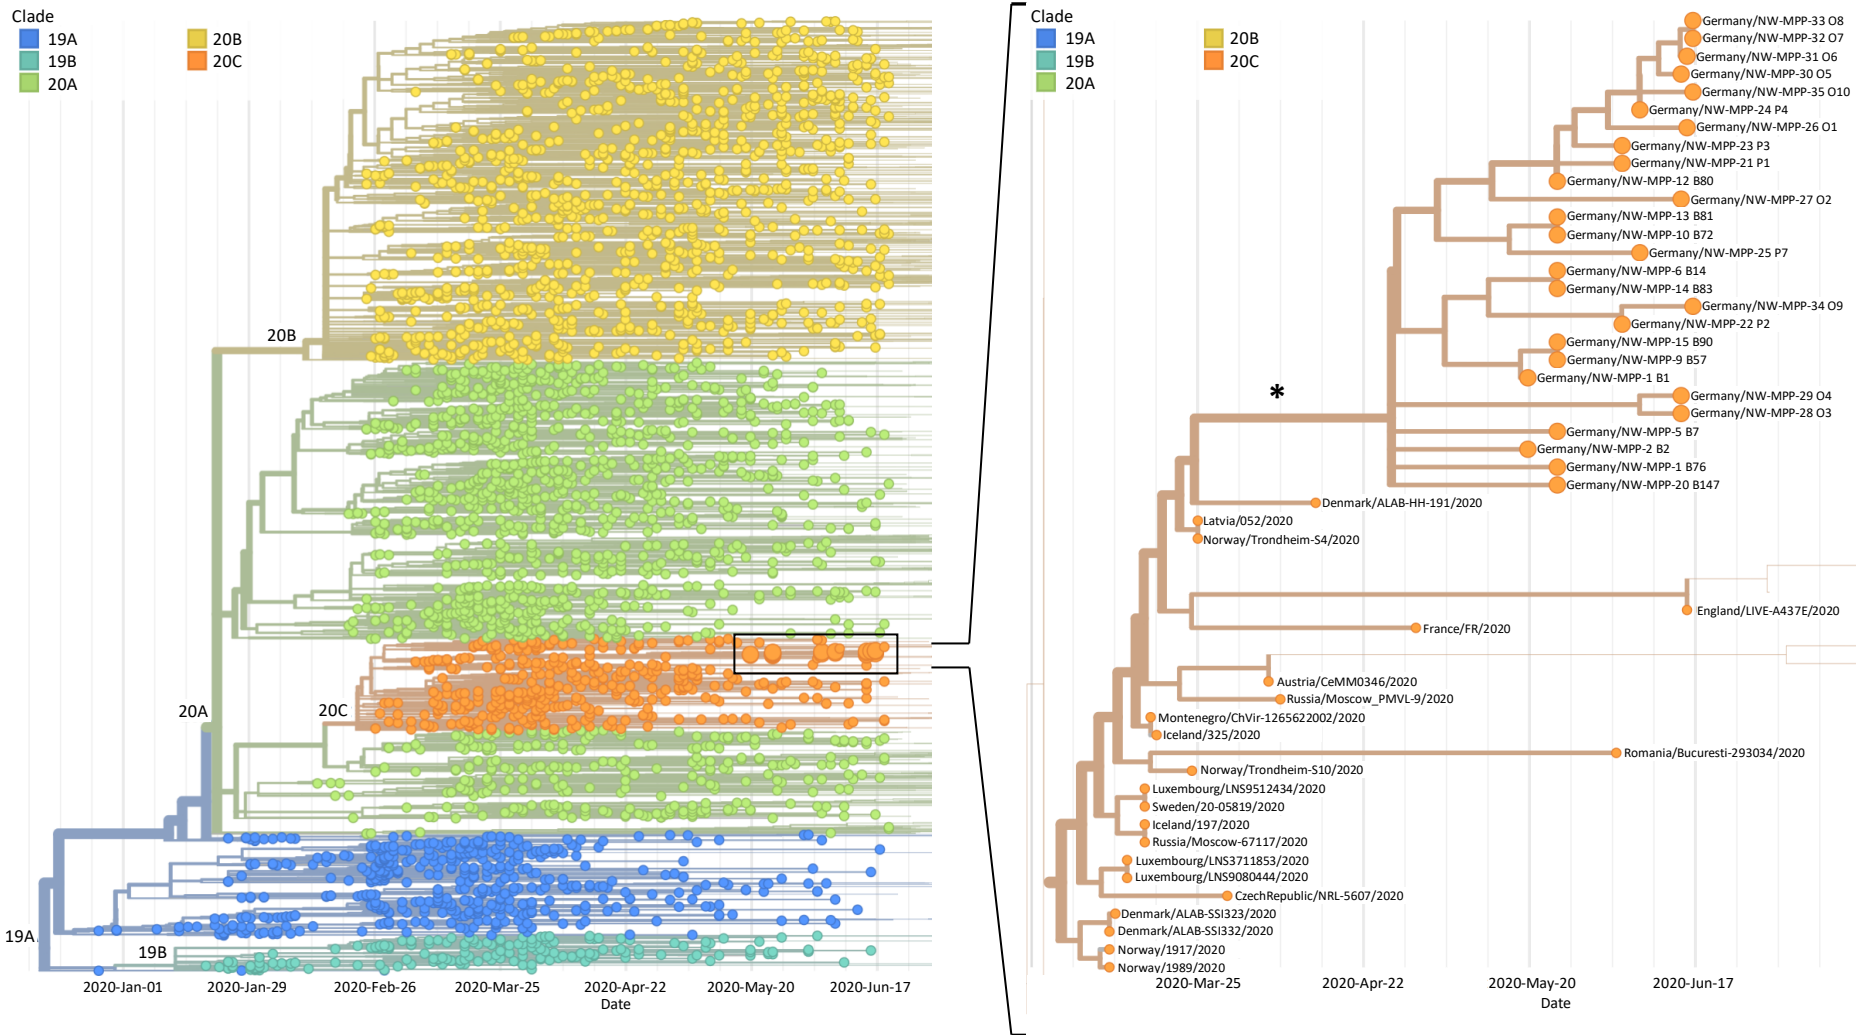

**Appendix Fig. S3. Time-based phylogenetic analysis of MPP-R samples within the context of European SARS-CoV-2 isolates.** Samples were analyzed and visualized within the phylogenetic context by nextstrain (nextstrain.org) using data available through GISAID (gisaid.org). Shown are 4051 of 5108 genomes sampled in Europe between Feb 2020 and Jun 2020 (left panel). MPP-R samples are indicated as enlarged circles in the rectangle. The branch containing MPP-R samples as well as related samples are depicted with GISAID identifier as well as the respective MPP-R sample ID in the right panel. The branch introducing the signature mutations C6406T and G18792A is marked by an asterisk.



**Appendix Table S2.** Infection rates among early shift beef processing workers in relation to workplace distance from the index case.

| <b>distance</b> | <b>count<sup>a</sup></b> | <b>positive<br/>count<sup>b</sup></b> | <b>infection rate</b> | <b>p-value<sup>c</sup></b> |
|-----------------|--------------------------|---------------------------------------|-----------------------|----------------------------|
| 1               | 0                        | 0                                     | n.a.                  | n.a.                       |
| 2               | 1                        | 1                                     | 100.0%                | 0.256410                   |
| 3               | 4                        | 3                                     | 75.0%                 | 0.054464                   |
| 4               | 9                        | 5                                     | 55.6%                 | 0.054091                   |
| 5               | 15                       | 9                                     | 60.0%                 | 0.005040                   |
| 6               | 19                       | 11                                    | 57.9%                 | 0.002848                   |
| 7               | 22                       | 14                                    | 63.6%                 | 0.000193                   |
| 8               | 26                       | 17                                    | 65.4%                 | 0.000023                   |
| 9               | 29                       | 17                                    | 58.6%                 | 0.000171                   |
| 10              | 37                       | 18                                    | 48.6%                 | 0.002173                   |
| 11              | 44                       | 18                                    | 40.9%                 | 0.019181                   |
| 12              | 48                       | 18                                    | 37.5%                 | 0.046932                   |
| 13              | 54                       | 18                                    | 33.3%                 | 0.128565                   |
| 14              | 58                       | 18                                    | 31.0%                 | 0.212003                   |
| 15              | 62                       | 18                                    | 29.0%                 | 0.314127                   |
| 16              | 65                       | 18                                    | 27.7%                 | 0.398091                   |
| 17              | 68                       | 19                                    | 27.9%                 | 0.376061                   |
| 18              | 70                       | 19                                    | 27.1%                 | 0.431501                   |
| 19              | 71                       | 19                                    | 26.8%                 | 0.459332                   |
| 20              | 72                       | 19                                    | 26.4%                 | 0.487055                   |
| 21              | 72                       | 19                                    | 26.4%                 | 0.487055                   |
| 22              | 72                       | 19                                    | 26.4%                 | 0.487055                   |
| 23              | 72                       | 19                                    | 26.4%                 | 0.487055                   |
| 24              | 72                       | 19                                    | 26.4%                 | 0.487055                   |
| 25              | 75                       | 19                                    | 25.3%                 | 0.568323                   |
| 26              | 76                       | 20                                    | 26.3%                 | 0.490084                   |
| 27              | 76                       | 20                                    | 26.3%                 | 0.490084                   |
| 28              | 76                       | 20                                    | 26.3%                 | 0.490084                   |
| 29              | 78                       | 20                                    | 25.6%                 | 0.543238                   |

**a,b** cumulative counts (excluding the index case) of workers with fixed work stations the indicated distance from the index case

**c** p-value for the hypothesis that the infection rate within the given range is higher than expected by chance

**Appendix Table S3.** Infection rates across apartments, bedrooms and carpools shared by early shift beef processing workers.

| unit id | unit type | unit members                |                                |                   |                      | unit members<br>in 8 m area |                         |
|---------|-----------|-----------------------------|--------------------------------|-------------------|----------------------|-----------------------------|-------------------------|
|         |           | total<br>count <sup>a</sup> | positive<br>count <sup>b</sup> | infection<br>rate | p-value <sup>c</sup> | count <sup>d</sup>          | percentage <sup>e</sup> |
| a1      | apartment | 7                           | 5                              | 71.4%             | 0.037                | 5                           | 71.4%                   |
| a2      | apartment | 4                           | 3                              | 75.0%             | 0.098                | 4                           | 100.0%                  |
| a3      | apartment | 4                           | 2                              | 50.0%             | 0.379                | 2                           | 50.0%                   |
| a4      | apartment | 6                           | 1                              | 16.7%             | 0.899                | 1                           | 16.7%                   |
| a5      | apartment | 6                           | 3                              | 50.0%             | 0.289                | 2                           | 33.3%                   |
| a6      | apartment | 5                           | 1                              | 20.0%             | 0.852                | 1                           | 20.0%                   |
| a7      | apartment | 6                           | 1                              | 16.7%             | 0.899                | 1                           | 16.7%                   |
| a8      | apartment | 4                           | 0                              | 0.0%              | 1.000                | 2                           | 50.0%                   |
| a9      | apartment | 4                           | 3                              | 75.0%             | 0.098                | 3                           | 75.0%                   |
| a10     | apartment | 4                           | 0                              | 0.0%              | 1.000                | 1                           | 25.0%                   |
| a11     | apartment | 6                           | 0                              | 0.0%              | 1.000                | 1                           | 16.7%                   |
| r1      | bedroom   | 2                           | 0                              | 0.0%              | 1.000                | 0                           | 0.0%                    |
| r2      | bedroom   | 2                           | 0                              | 0.0%              | 1.000                | 0                           | 0.0%                    |
| r3      | bedroom   | 2                           | 0                              | 0.0%              | 1.000                | 0                           | 0.0%                    |
| r4      | bedroom   | 2                           | 1                              | 50.0%             | 0.534                | 1                           | 50.0%                   |
| r5      | bedroom   | 3                           | 3                              | 100.0%            | 0.032                | 2                           | 66.7%                   |
| r6      | bedroom   | 2                           | 1                              | 50.0%             | 0.534                | 2                           | 100.0%                  |
| r7      | bedroom   | 4                           | 1                              | 25.0%             | 0.783                | 0                           | 0.0%                    |
| r8      | bedroom   | 2                           | 0                              | 0.0%              | 1.000                | 1                           | 50.0%                   |
| r9      | bedroom   | 2                           | 1                              | 50.0%             | 0.534                | 1                           | 50.0%                   |
| r10     | bedroom   | 2                           | 0                              | 0.0%              | 1.000                | 1                           | 50.0%                   |
| r11     | bedroom   | 2                           | 0                              | 0.0%              | 1.000                | 1                           | 50.0%                   |
| r12     | bedroom   | 2                           | 2                              | 100.0%            | 0.101                | 2                           | 100.0%                  |
| r13     | bedroom   | 2                           | 0                              | 0.0%              | 1.000                | 1                           | 50.0%                   |
| r14     | bedroom   | 2                           | 0                              | 0.0%              | 1.000                | 0                           | 0.0%                    |
| r15     | bedroom   | 2                           | 0                              | 0.0%              | 1.000                | 0                           | 0.0%                    |
| r16     | bedroom   | 2                           | 0                              | 0.0%              | 1.000                | 1                           | 50.0%                   |
| c1      | carpool   | 7                           | 5                              | 71.4%             | 0.037                | 5                           | 71.4%                   |
| c2      | carpool   | 4                           | 0                              | 0.0%              | 1.000                | 1                           | 25.0%                   |
| c3      | carpool   | 8                           | 5                              | 62.5%             | 0.073                | 6                           | 75.0%                   |
| c4      | carpool   | 7                           | 3                              | 42.9%             | 0.393                | 6                           | 85.7%                   |
| c5      | carpool   | 5                           | 1                              | 20.0%             | 0.852                | 1                           | 20.0%                   |
| c6      | carpool   | 4                           | 3                              | 75.0%             | 0.098                | 3                           | 75.0%                   |
| c7      | carpool   | 2                           | 0                              | 0.0%              | 1.000                | 1                           | 50.0%                   |
| c8      | carpool   | 3                           | 2                              | 66.7%             | 0.238                | 1                           | 33.3%                   |
| c9      | carpool   | 3                           | 1                              | 33.3%             | 0.682                | 2                           | 66.7%                   |

**a** count of all members in a given unit

**b** count of infected members in a given unit

**c** p-value for the hypothesis that the infection rate within the given unit is higher than expected by chance

**d,e** count (b) and percentage (c) of unit members with fixed work stations within a maximum distance of 8 meters from the index case



**Appendix Table S4. Primers used in multiplex PCR for Amplicon Sequencing.**

| Pool 1 Primer ID        | sequence                       | Pool 2 Primer ID        | sequence                     |
|-------------------------|--------------------------------|-------------------------|------------------------------|
| nCoV-2019_1_LEFT        | ACCAACCAACTTCGATCTCTGT         | nCoV-2019_2_LEFT        | CTGTTTTACAGGTCGCGACGT        |
| nCoV-2019_1_RIGHT       | CATCTTAAAGATGTTGACGTGCCTC      | nCoV-2019_2_RIGHT       | TAAGGATCAGTGCCAAGCTCGT       |
| nCoV-2019_3_LEFT        | CGGTAATAAAGGAGCTGGTGCC         | nCoV-2019_4_LEFT        | GGGTATACTGCTGCCGTGAAC        |
| nCoV-2019_3_RIGHT       | AAGGTGCTGCAATTCATAGCTCT        | nCoV-2019_4_RIGHT       | CACAAGTAGTGGCACCTCTTAGT      |
| nCoV-2019_5_LEFT        | TGGTGAACCTCATGGCAGACG          | nCoV-2019_6_LEFT        | GGTGTGTTGGAGAAGGTTCCG        |
| nCoV-2019_5_RIGHT       | ATTGATGTTGACTTTCTCTTTGGAGT     | nCoV-2019_6_RIGHT       | TAGCGGCCTCTGTAAACACG         |
| nCoV-2019_7_LEFT_alt0   | CATTTGCATCAGAGGCTGCTCG         | nCoV-2019_8_LEFT        | AGAGTTTCTTAGAGACGGTTGGGA     |
| nCoV-2019_7_RIGHT_alt5  | AGGTGACAATTTGCCACCGAC          | nCoV-2019_8_RIGHT       | GCTTCAACAGCTTCACTAGTAGGT     |
| nCoV-2019_9_LEFT_alt4   | TTCCCACAGAAGTGTAAACAGAGG       | nCoV-2019_10_LEFT       | TGGAAGGTGCTGCCTATACAGT       |
| nCoV-2019_9_RIGHT_alt2  | GACAGCATCTGCCACAACACG          | nCoV-2019_10_RIGHT      | TCATCTAACCAATCTTCTTCTGCTCT   |
| nCoV-2019_11_LEFT       | GGAAATTTGGTCCACTTCTGCT         | nCoV-2019_12_LEFT       | AAACATGGAGGAGGTGTGACG        |
| nCoV-2019_11_RIGHT      | TCATCAGATTCAACTGCATGGCA        | nCoV-2019_12_RIGHT      | TTCACTTTCATTTCCAAAAGCTTGA    |
| nCoV-2019_13_LEFT       | TCGCACAAATGTCTACTTAGCTGT       | nCoV-2019_14_LEFT_alt4  | TGGCAATCTTCATCCAGATTCTGC     |
| nCoV-2019_13_RIGHT      | ACCCACAGCAGTTAAACACCTC         | nCoV-2019_14_RIGHT_alt2 | TGGGTGTTCTTCTGTCATGTGC       |
| nCoV-2019_15_LEFT_alt1  | AGTGCTTAAAAAGTGTAAAAAGTCCCT    | nCoV-2019_16_LEFT       | AATTTGGAAGAAGCTGCTCGGT       |
| nCoV-2019_15_RIGHT_alt3 | ACTGTAGCTGGCACTTTGAGAGA        | nCoV-2019_16_RIGHT      | CACAACCTTGGTGGGAGGTTA        |
| nCoV-2019_17_LEFT       | CTTCTTTCTTTGAGAGAAGTGAGACT     | nCoV-2019_18_LEFT_alt2  | ACTCTAATTAAGGGCAGATAACCACTGT |
| nCoV-2019_17_RIGHT      | TTTGTGGAGTGTTAAACATGCAGT       | nCoV-2019_18_RIGHT_alt1 | GCTTGTTTACCACAGTACAAGG       |
| nCoV-2019_19_LEFT       | GCTGTTATGTACATGGGCACACT        | nCoV-2019_20_LEFT       | ACAAAGAAAACAGTTACACAACAACCA  |
| nCoV-2019_19_RIGHT      | TGTCCAACCTAGGGTCAATTTCTGT      | nCoV-2019_20_RIGHT      | ACGTGGCTTTATTAGTTGCATTGTT    |
| nCoV-2019_21_LEFT_alt2  | GGCTATTGATTATAAACACTACACACCCT  | nCoV-2019_22_LEFT       | ACTACCGAAGTTGAGGAGACATTATACT |
| nCoV-2019_21_RIGHT_alt0 | GATCTGTGTGGCCAACTCTTC          | nCoV-2019_22_RIGHT      | ACAGTATCTTTGCTATAGTAGTCCGC   |
| nCoV-2019_23_LEFT       | ACAACCTACTAACATAGTTACACGGTGT   | nCoV-2019_24_LEFT       | AGGCATGCCTTCTACTGACTG        |
| nCoV-2019_23_RIGHT      | ACCACTACAGTAGGTTGCAATAGTG      | nCoV-2019_24_RIGHT      | ACATTCTAACCATAGCTGAAATCGGG   |
| nCoV-2019_25_LEFT       | GCAATTTGTTTTGAGCTATTTTGCAGT    | nCoV-2019_26_LEFT       | TTGTGATACATTCTGTGCTGGTAGT    |
| nCoV-2019_25_RIGHT      | ACTGTAGTGACAAGTCTCTCGCA        | nCoV-2019_26_RIGHT      | TCCGCACATACCAACATCAG         |
| nCoV-2019_27_LEFT       | ACTACAGTCAGCTTATGTGTCAACC      | nCoV-2019_28_LEFT       | ACATAGAAGTTACTGGCGATAGTTGT   |
| nCoV-2019_27_RIGHT      | AATACAAGCACCAAGGTACCGG         | nCoV-2019_28_RIGHT      | TGTTTAGACATGACATGAACAGGTTG   |
| nCoV-2019_29_LEFT       | ACTTGTGTTCTTTTGTGCTGC          | nCoV-2019_30_LEFT       | GCACAACATAGTGTGACTTTTGCA     |
| nCoV-2019_29_RIGHT      | AGTGTACTCTATAAGTTTTGATGGTGTGT  | nCoV-2019_30_RIGHT      | ACCACTAGTAGATACAAAACCCAG     |
| nCoV-2019_31_LEFT       | TTCTGAGTACTGTAGGCACGGC         | nCoV-2019_32_LEFT       | TGGGAATACAGTCATGTAGTTGCC     |
| nCoV-2019_31_RIGHT      | ACAGAATAAACACCAGGTAAGAATGAGT   | nCoV-2019_32_RIGHT      | AGCACACTACTACGCAACTTTAGA     |
| nCoV-2019_33_LEFT       | ACTTTTGAAGAAGCTGCGCTGT         | nCoV-2019_34_LEFT       | TCCCCTCTGGTAAAGTTGAGGGT      |
| nCoV-2019_33_RIGHT      | TGGACAGTAAACTACGTATCAAGC       | nCoV-2019_34_RIGHT      | AGTGAATTTGGCCCTCATAGCA       |
| nCoV-2019_35_LEFT       | TGTTTCGATTCAACCAGGACAG         | nCoV-2019_36_LEFT       | TTAGCTTGGTTGCTAGCTGCTG       |
| nCoV-2019_35_RIGHT      | ACTTCATAGCCACAAGGTTAAAGTCA     | nCoV-2019_36_RIGHT      | GAACAAAGACCATTGAGTACTCTGGA   |
| nCoV-2019_37_LEFT       | ACACACCCTGGTTGTTACTCAC         | nCoV-2019_38_LEFT       | ACTGTGTTATGTATGCATCAGCTGT    |
| nCoV-2019_37_RIGHT      | GTCCACACTCTCTAGCCACAT          | nCoV-2019_38_RIGHT      | CCTCAAGAGACTGCTAAAGTAGCGG    |
| nCoV-2019_39_LEFT       | AGTATTGCCTATTTTCTCATAACTGGT    | nCoV-2019_40_LEFT       | TGCACATCAGTAGTCTTACTCTCAGT   |
| nCoV-2019_39_RIGHT      | TGTAACCTGGACACATTGAGCCCT       | nCoV-2019_40_RIGHT      | CATGGCTGCATCAGCTCAAAT        |
| nCoV-2019_41_LEFT       | GTTCCCTCCATCATATGCAGCT         | nCoV-2019_42_LEFT       | TGCAAGAGATGGTTGTGTTCC        |
| nCoV-2019_41_RIGHT      | TGGTATGACAACCATTAGTTTTGGCT     | nCoV-2019_42_RIGHT      | CCTACCTCCTTTGTTGTGTTGT       |
| nCoV-2019_43_LEFT       | TACGACAGATGCTTGTGCTGC          | nCoV-2019_44_LEFT_alt3  | CCACAGTACGCTACAAGCTGG        |
| nCoV-2019_43_RIGHT      | AGCAGCATCTACAGCAAAAGCA         | nCoV-2019_44_RIGHT_alt0 | CGCAGACGGTACAGACTGTGTT       |
| nCoV-2019_45_LEFT_alt2  | AGTATGTACAAATACCTACAACCTTGTGCT | nCoV-2019_46_LEFT_alt1  | CGCTTCAAGAAAAGGACGAAGA       |
| nCoV-2019_45_RIGHT_alt7 | TTCATGTTGGTAGTTAGAGAAAGTGTGTC  | nCoV-2019_46_RIGHT_alt2 | CACGTTCCACTAAGTTGGCGTAT      |
| nCoV-2019_47_LEFT       | AGGACTGGTATGATTTGTAGAAAACCC    | nCoV-2019_48_LEFT       | TGTTGACACTGACTTAAACAAAGCCT   |
| nCoV-2019_47_RIGHT      | AATAACGGTCAAAGAGTTTTAACCTCTC   | nCoV-2019_48_RIGHT      | TAGATTACCAGAAGCAGCGTGC       |
| nCoV-2019_49_LEFT       | AGGAATTACTTGTGTATGCTGCTGA      | nCoV-2019_50_LEFT       | GTTGATAAGTACTTTGATTTACGATGGT |
| nCoV-2019_49_RIGHT      | TGACGATGACTTGGTTAGCATTAAATACA  | nCoV-2019_50_RIGHT      | TAACATGTTGTGCCAACACCA        |
| nCoV-2019_51_LEFT       | TCAATAGCCGCCACTAGAGGAG         | nCoV-2019_52_LEFT       | CATCAGGAGATGCCACAACCTGC      |
| nCoV-2019_51_RIGHT      | AGTGCATTAACATTGGCCGTGA         | nCoV-2019_52_RIGHT      | GTTGAGAGCAAAAATTCAAGAGTCC    |
| nCoV-2019_53_LEFT       | AGCAAAATGTTGGACTGAGACTGA       | nCoV-2019_54_LEFT       | TGAGTTAACAGGACACATGTTAGACA   |
| nCoV-2019_53_RIGHT      | AGCCTCATAAAACTCAGGTTCC         | nCoV-2019_54_RIGHT      | AACCAAAAACCTTGCATTAGCACA     |
| nCoV-2019_55_LEFT       | ACTCAACTTACTTAGGAGGTATGAGCT    | nCoV-2019_56_LEFT       | ACCTAGACCACCACTTAACCGA       |
| nCoV-2019_55_RIGHT      | GGTGTACTCTCCTATTTGACTTTACTGT   | nCoV-2019_56_RIGHT      | ACACTATGCGAGCAGAAGGGTA       |
| nCoV-2019_57_LEFT       | ATTCTACACTCCAGGGACCC           | nCoV-2019_58_LEFT       | TGATTTGAGTGTGTCAATGCCAGA     |
| nCoV-2019_57_RIGHT      | GTAATTTGAGCAGGGTCGCAAT         | nCoV-2019_58_RIGHT      | CTTTTCTCAAGCAGGGTTACGT       |
| nCoV-2019_59_LEFT       | TCACGCATGATGTTTCATCTGCA        | nCoV-2019_60_LEFT       | TGATAGAGACCTTTATGACAAGTTGCA  |
| nCoV-2019_59_RIGHT      | AAGAGTCTGTTACATTTTCACTGTTG     | nCoV-2019_60_RIGHT      | GGTACCAACAGCTTCTCTAGTAGC     |
| nCoV-2019_61_LEFT       | TGTTTTATCACCCGGAAGAAGC         | nCoV-2019_62_LEFT       | GGCAGTGGCTTTGAGTTGACA        |
| nCoV-2019_61_RIGHT      | ATCACATAGACAACAGGTGCGC         | nCoV-2019_62_RIGHT      | GTTGAACCTTTTACAAGCCGC        |
| nCoV-2019_63_LEFT       | TGTTAAGCGTGTGACTGGACT          | nCoV-2019_64_LEFT       | TCGATAGATCTCTGCTAATTTCCATTGT |
| nCoV-2019_63_RIGHT      | ACAAACTGCCACCATCAACCC          | nCoV-2019_64_RIGHT      | AGTCTGTAAAAGTGTCCAGAGGT      |
| nCoV-2019_65_LEFT       | GCTGGCTTTAGCTTGTGGGTTT         | nCoV-2019_66_LEFT       | GGGTGTGGACATTGCTGCTAAT       |
| nCoV-2019_65_RIGHT      | TGTCAGTCATAGACAACAACCAATAGT    | nCoV-2019_66_RIGHT      | TCAATTTGATTTGACTCTGGGT       |
| nCoV-2019_67_LEFT       | GTTGTCCAACAATTACCTGAACTTACT    | nCoV-2019_68_LEFT       | ACAGGTTCACTAAGTGTGTGTGT      |
| nCoV-2019_67_RIGHT      | CAACCTTAGAACTACAGATAAATCTTGGG  | nCoV-2019_68_RIGHT      | CTCCCTTATCAGAACCCAGCA        |
| nCoV-2019_69_LEFT       | TGTCGCAAAATATACTCAACTGTGTCA    | nCoV-2019_70_LEFT       | ACAAAAGAAAATGACTCTAAAGGGTTT  |
| nCoV-2019_69_RIGHT      | TCTTTATAGCCACGGAACTCCA         | nCoV-2019_70_RIGHT      | TGACCTCTTTTAAAGACATAACAGCAG  |
| nCoV-2019_71_LEFT       | ACAATCCAATTGAGTTGCTTCTTCTATTC  | nCoV-2019_72_LEFT       | ACAGTGGTGTATTACCTGAC         |

|                         |                                |                         |                              |
|-------------------------|--------------------------------|-------------------------|------------------------------|
| nCoV-2019_71_RIGHT      | TGGAAAAGAAAGGTAAAGAACAAAGTCCT  | nCoV-2019_72_RIGHT      | ACTCTGAACTCACTTTCATCCAAC     |
| nCoV-2019_73_LEFT       | CAATTTTGTAAATGATCCATTTTGGGTGT  | nCoV-2019_74_LEFT       | ACATCACTAGGTTTCAAACCTTACTTGC |
| nCoV-2019_73_RIGHT      | CACCAGCTGTCCAACCTGAAGA         | nCoV-2019_74_RIGHT      | GCAACACAGTTGCTGATTCTCTTC     |
| nCoV-2019_75_LEFT       | AGAGTCCAACCAACAGAATCTATTGT     | nCoV-2019_76_LEFT_alt3  | GGGCAAACCTGAAAGATTGCTGA      |
| nCoV-2019_75_RIGHT      | ACCACCAACCTTAGAATCAAGATTGT     | nCoV-2019_76_RIGHT_alt0 | ACCTGTGCCTGTTAAACCAATTGA     |
| nCoV-2019_77_LEFT       | CCAGCAACTGTTTGTGGACCTA         | nCoV-2019_78_LEFT       | CAACTTACTCTACTTGGCGTGT       |
| nCoV-2019_77_RIGHT      | CAGCCCCTATTAAACAGCCTGC         | nCoV-2019_78_RIGHT      | TGTGTACAAAACTGCCATATTGCA     |
| nCoV-2019_79_LEFT       | GTGGTGATTCAACTGAATGCAGC        | nCoV-2019_80_LEFT       | TTGCCTTGGTGATATTGCTGCT       |
| nCoV-2019_79_RIGHT      | CATTTTCATCTGTGAGCAAAGGTGG      | nCoV-2019_80_RIGHT      | TGGAGCTAAGTTGTTTAAACAAGCG    |
| nCoV-2019_81_LEFT       | GCACTTGAAAACTTCAAGATGTGG       | nCoV-2019_82_LEFT       | GGGCTATCATCTTATGTCCTCCCT     |
| nCoV-2019_81_RIGHT      | GTGAAGTCTTTTCTTGTGCAGGG        | nCoV-2019_82_RIGHT      | TGCCAGAGATGTCACCTAAATCAA     |
| nCoV-2019_83_LEFT       | TCCTTTGCAACCTGAATTAGACTCA      | nCoV-2019_84_LEFT       | TGCTGTAGTTGCTCAAGGGCT        |
| nCoV-2019_83_RIGHT      | TTTGACTCCTTGAGCACTGGC          | nCoV-2019_84_RIGHT      | AGGTGTGAGTAACTGTTACAAACAAC   |
| nCoV-2019_85_LEFT       | ACTAGCACTCTCCAAGGGTGT          | nCoV-2019_86_LEFT       | TCAGGTGATGGCACAACAAGTC       |
| nCoV-2019_85_RIGHT      | ACACAGTCTTTACTCCAGATTCCC       | nCoV-2019_86_RIGHT      | ACGAAAGCAAGAAAAAGAGTACGC     |
| nCoV-2019_87_LEFT       | CGACTACTAGCGTGCCTTTGTA         | nCoV-2019_88_LEFT       | CCATGGCAGATTCCAACGGTAC       |
| nCoV-2019_87_RIGHT      | ACTAGGTTCCATTGTTCAAGGAGC       | nCoV-2019_88_RIGHT      | TGGTCAGAATAGTCCATGGAGT       |
| nCoV-2019_89_LEFT_alt2  | CGCGTCCATGTGGTCATTCAA          | nCoV-2019_90_LEFT       | ACACAGACCATTCCAGTAGCAGT      |
| nCoV-2019_89_RIGHT_alt4 | ACGAGATGAAACATCTGTTGTCACT      | nCoV-2019_90_RIGHT      | TGAAATGGTGAATTGCCCTCGT       |
| nCoV-2019_91_LEFT       | TCACTACCAAGAGTGTGTTAGAGGT      | nCoV-2019_92_LEFT       | TTTGTGCTTTTTAGCCTTTCTGCT     |
| nCoV-2019_91_RIGHT      | TTCAAGTGAGAACCAAAAAGATAATAAGCA | nCoV-2019_92_RIGHT      | AGGTTCTGGCAATTAATTGTAAGGG    |
| nCoV-2019_93_LEFT       | TGAGGCTGGTTCTAAATCACCCA        | nCoV-2019_94_LEFT       | GGCCCCAAGGTTTACCCAATAA       |
| nCoV-2019_93_RIGHT      | AGGTCTTCCTTGCCATGTTGAG         | nCoV-2019_94_RIGHT      | TTTGGCAATGTGTTCTTGGAGG       |
| nCoV-2019_95_LEFT       | TGAGGGAGCCTTGAATACACCA         | nCoV-2019_96_LEFT       | GCCAAACAACAAGGCCAAAC         |
| nCoV-2019_95_RIGHT      | CAGTACGTTTTTGCCGAGGCTT         | nCoV-2019_96_RIGHT      | TAGGCTCTGTGGTGGGAATGT        |
| nCoV-2019_97_LEFT       | TGGATGACAAAGATCCAATTTCAAAGA    | nCoV-2019_98_LEFT       | AACAATTGCAACAATCCATGAGCA     |
| nCoV-2019_97_RIGHT      | ACACACTGATTAAGATTGCTATGTGAG    | nCoV-2019_98_RIGHT      | TTCTCCTAAGAAGCTATTAATAACATG  |

**Appendix Table S5.** Amplicon-Seq statistics.

| sample ID | rep#* | read counts | coverage (average)** | stdev | coverage (median)** | 25th percentile | 50th percentile | 75th percentile | covered (%)** |
|-----------|-------|-------------|----------------------|-------|---------------------|-----------------|-----------------|-----------------|---------------|
| B1        | 1     | 31466       | 362.7                | 196.3 | 345                 | 228             | 345             | 458             | 100.0         |
| B1        | 2     | 29502       | 340.0                | 178.3 | 314                 | 217             | 314             | 433             | 100.0         |
| B2        | 1     | 24165       | 278.7                | 163.2 | 286                 | 162             | 286             | 353             | 100.0         |
| B2        | 2     | 32248       | 371.6                | 220.9 | 362                 | 199             | 362             | 502             | 100.0         |
| B5        | 1     | 27837       | 321.0                | 219.5 | 301                 | 143             | 301             | 440             | 100.0         |
| B5        | 2     | 33036       | 380.6                | 237.1 | 365                 | 208             | 365             | 524             | 100.0         |
| B6        | 1     | 27594       | 318.0                | 191.9 | 306                 | 179             | 306             | 418             | 100.0         |
| B6        | 2     | 26723       | 307.7                | 182.7 | 284                 | 179             | 284             | 416             | 100.0         |
| B7        | 1     | 28782       | 331.6                | 218.3 | 322                 | 166             | 322             | 463             | 100.0         |
| B7        | 2     | 26853       | 309.6                | 206.7 | 299                 | 150             | 299             | 424             | 100.0         |
| B14       | 1     | 33212       | 384.8                | 549.1 | 159                 | 24              | 159             | 463             | 92.0          |
| B24       | 1     | 33485       | 386.1                | 223.2 | 378                 | 240             | 378             | 492             | 100.0         |
| B24       | 2     | 23302       | 268.5                | 150.5 | 256                 | 157             | 256             | 341             | 100.0         |
| B55       | 1     | 28897       | 332.6                | 172.5 | 321                 | 221             | 321             | 404             | 100.0         |
| B55       | 2     | 23373       | 269.1                | 140.8 | 251                 | 181             | 251             | 335             | 100.0         |
| B57       | 1     | 31869       | 367.0                | 224.7 | 340                 | 218             | 340             | 484             | 100.0         |
| B57       | 2     | 23027       | 265.3                | 159.4 | 242                 | 152             | 242             | 336             | 100.0         |
| B72       | 1     | 26706       | 307.9                | 208.2 | 315                 | 140             | 315             | 423             | 100.0         |
| B72       | 2     | 25333       | 292.0                | 194.5 | 292                 | 129.75          | 292             | 397             | 100.0         |
| B76       | 1     | 21963       | 253.2                | 154.8 | 228                 | 154             | 228             | 339             | 100.0         |
| B76       | 2     | 26611       | 306.4                | 170.7 | 281                 | 187             | 281             | 390             | 100.0         |
| B80       | 1     | 23140       | 266.7                | 214.8 | 245                 | 86              | 245             | 390             | 100.0         |
| B80       | 2     | 28317       | 326.5                | 228.7 | 313                 | 138             | 313             | 469             | 100.0         |
| B81       | 1     | 23412       | 270.2                | 220.2 | 260                 | 94              | 260             | 390             | 98.2          |
| B81       | 2     | 26996       | 311.1                | 214.5 | 311                 | 144             | 311             | 439             | 100.0         |
| B83       | 1     | 28699       | 331.1                | 287.8 | 297                 | 100             | 297             | 498             | 99.0          |
| B83       | 2     | 29652       | 342.0                | 262.8 | 300                 | 135             | 300             | 490             | 99.2          |
| B90       | 1     | 26181       | 302.9                | 320.6 | 223                 | 40              | 223             | 433             | 97.4          |
| B90       | 2     | 27205       | 314.5                | 293.2 | 256                 | 92              | 256             | 470             | 97.4          |
| B93       | 1     | 24823       | 286.2                | 169.8 | 274                 | 163             | 274             | 386             | 100.0         |
| B93       | 2     | 22981       | 264.6                | 158.1 | 241                 | 148             | 241             | 352             | 100.0         |
| B98       | 1     | 31366       | 362.1                | 283.3 | 364                 | 144             | 364             | 498             | 100.0         |
| B98       | 2     | 25067       | 289.1                | 193.6 | 295                 | 150             | 295             | 397             | 100.0         |
| B114      | 1     | 26101       | 300.6                | 255.6 | 256                 | 90              | 256             | 459             | 100.0         |
| B114      | 2     | 29577       | 341.1                | 219.5 | 351                 | 184             | 351             | 472             | 100.0         |
| B121      | 1     | 33882       | 391.2                | 276.3 | 406                 | 204             | 406             | 551             | 100.0         |
| B121      | 2     | 32130       | 370.7                | 253.5 | 380                 | 182             | 379.5           | 501             | 100.0         |
| B148      | 1     | 26283       | 302.7                | 200.5 | 289                 | 162             | 289             | 414             | 100.0         |
| B148      | 2     | 24778       | 285.2                | 171.0 | 271                 | 165             | 270.5           | 384             | 100.0         |
| O1        | 1     | 68603       | 793.9                | 944.9 | 368                 | 52              | 368             | 1148            | 98.2          |
| O1        | 2     | 58107       | 673.0                | 849.4 | 293                 | 33              | 293             | 912             | 95.7          |
| O2        | 1     | 77839       | 897.7                | 528.9 | 895                 | 479             | 895             | 1175            | 100.0         |
| O2        | 2     | 60383       | 696.4                | 398.8 | 684                 | 407             | 684             | 889             | 100.0         |
| O3        | 1     | 69961       | 807.0                | 401.3 | 765                 | 529             | 765             | 1027            | 100.0         |
| O3        | 2     | 58416       | 673.8                | 344.4 | 646                 | 429             | 646             | 846             | 100.0         |
| O4        | 1     | 84575       | 976.8                | 713.5 | 952                 | 354             | 952             | 1443            | 100.0         |
| O4        | 2     | 82025       | 947.0                | 708.3 | 863                 | 303             | 863             | 1386            | 100.0         |
| O5        | 1     | 56255       | 648.8                | 308.0 | 624                 | 450             | 624             | 810             | 100.0         |
| O5        | 2     | 27286       | 313.9                | 163.8 | 285                 | 205             | 285             | 393             | 100.0         |
| O6        | 1     | 74388       | 860.2                | 842.2 | 662                 | 145             | 662             | 1258            | 99.2          |
| O6        | 2     | 74010       | 854.9                | 764.8 | 675                 | 169             | 675             | 1345            | 99.2          |
| O7        | 1     | 54104       | 623.6                | 289.2 | 582                 | 410             | 582             | 768             | 100.0         |
| O7        | 2     | 77352       | 891.1                | 413.8 | 806                 | 637             | 806             | 1074            | 100.0         |
| O8        | 1     | 69675       | 804.5                | 541.0 | 814                 | 360             | 814             | 1110            | 100.0         |
| O8        | 2     | 67667       | 780.0                | 435.0 | 795                 | 489             | 795             | 1022            | 100.0         |

|     |   |        |        |        |      |      |      |      |       |
|-----|---|--------|--------|--------|------|------|------|------|-------|
| O9  | 1 | 56886  | 656.1  | 351.7  | 650  | 414  | 650  | 853  | 100.0 |
| O9  | 2 | 74283  | 856.8  | 467.4  | 864  | 515  | 864  | 1071 | 100.0 |
| O10 | 1 | 62298  | 719.4  | 571.4  | 642  | 229  | 642  | 1006 | 99.2  |
| O10 | 2 | 50281  | 580.9  | 433.2  | 540  | 163  | 540  | 875  | 100.0 |
| P1  | 1 | 74427  | 859.5  | 645.4  | 790  | 301  | 790  | 1243 | 100.0 |
| P1  | 2 | 70738  | 816.5  | 564.5  | 805  | 372  | 805  | 1190 | 100.0 |
| P2  | 1 | 74485  | 862.7  | 1436.8 | 164  | 20   | 164  | 805  | 94.7  |
| P2  | 2 | 89809  | 1041.5 | 1671.6 | 217  | 24   | 217  | 1153 | 96.4  |
| P3  | 1 | 58514  | 674.7  | 361.3  | 651  | 416  | 651  | 858  | 100.0 |
| P3  | 2 | 53533  | 617.4  | 322.0  | 603  | 390  | 603  | 797  | 100.0 |
| P4  | 1 | 55782  | 644.5  | 412.5  | 642  | 292  | 642  | 920  | 100.0 |
| P4  | 2 | 81385  | 939.1  | 613.2  | 949  | 445  | 949  | 1285 | 100.0 |
| P7  | 1 | 63529  | 732.7  | 368.4  | 714  | 493  | 714  | 912  | 100.0 |
| P7  | 2 | 71523  | 825.9  | 371.8  | 812  | 621  | 812  | 978  | 100.0 |
| D1  | 1 | 132841 | 1535.6 | 940.9  | 1490 | 846  | 1490 | 2113 | 100.0 |
| D1  | 2 | 117432 | 1354.9 | 605.6  | 1299 | 984  | 1299 | 1646 | 100.0 |
| D2  | 1 | 117149 | 1352.2 | 822.5  | 1269 | 800  | 1269 | 1812 | 100.0 |
| D2  | 2 | 161684 | 1866.5 | 820.4  | 1740 | 1399 | 1740 | 2177 | 100.0 |

\*) Replicates represent independent cDNA synthesis, library preparation and sequencing reactions performed from the same RNA sample.

\*\*\*) calculated for the part of the genome that is targeted by amplicon-seq (nt. 55-29836).

**Appendix Table 6.** Comparison of SARS-CoV-2 genotypes identified in this study to sequences deposited in the GISAID database

| strain                  | gisaid accession | date       | country | division   | clade | C6406T | C18972A | date submitted |
|-------------------------|------------------|------------|---------|------------|-------|--------|---------|----------------|
| England/CAMB-782FE/2020 | EPI_ISL_433715   | 2020-04-04 | UK      | England    | 20B   | no     | yes     | 2020-04-29     |
| Wales/PHWC-15D09A/2020  | EPI_ISL_472664   | 2020-05-03 | UK      | Wales      | 20B   | yes    | no      | 2020-06-23     |
| Wales/PHWC-15D188/2020  | EPI_ISL_472676   | 2020-04-19 | UK      | Wales      | 20B   | yes    | no      | 2020-06-23     |
| Wales/PHWC-15DC78/2020  | EPI_ISL_472768   | 2020-05-13 | UK      | Wales      | 20B   | yes    | no      | 2020-06-23     |
| Wales/PHWC-16093F/2020  | EPI_ISL_472995   | 2020-05-22 | UK      | Wales      | 20B   | yes    | no      | 2020-06-23     |
| Wales/PHWC-16344A/2020  | EPI_ISL_473296   | 2020-05-06 | UK      | Wales      | 20B   | yes    | no      | 2020-06-23     |
| Wales/PHWC-163592/2020  | EPI_ISL_473965   | 2020-04-24 | UK      | Wales      | 20B   | yes    | no      | 2020-06-23     |
| Wales/PHWC-163BEB/2020  | EPI_ISL_474055   | 2020-05-09 | UK      | Wales      | 20B   | yes    | no      | 2020-06-23     |
| Wales/PHWC-163E4C/2020  | EPI_ISL_474091   | 2020-05-06 | UK      | Wales      | 20B   | yes    | no      | 2020-06-23     |
| Wales/PHWC-163F67/2020  | EPI_ISL_474107   | 2020-04-22 | UK      | Wales      | 20B   | yes    | no      | 2020-06-23     |
| Wales/PHWC-164F1B/2020  | EPI_ISL_479398   | 2020-05-18 | UK      | Wales      | 20B   | yes    | no      | 2020-06-30     |
| Wales/PHWC-2ACA2/2020   | EPI_ISL_445688   | 2020-04-06 | UK      | Wales      | 20B   | yes    | no      | 2020-05-16     |
| Wales/PHWC-2E312/2020   | EPI_ISL_446088   | 2020-04-16 | UK      | Wales      | 20B   | yes    | no      | 2020-05-16     |
| Wales/PHWC-31B6F/2020   | EPI_ISL_474326   | 2020-04-11 | UK      | Wales      | 20B   | no     | yes     | 2020-06-23     |
| Wales/PHWC-31BE7/2020   | EPI_ISL_446542   | 2020-04-11 | UK      | Wales      | 20B   | yes    | no      | 2020-05-16     |
| Wales/PHWC-323C0/2020   | EPI_ISL_446641   | 2020-04-08 | UK      | Wales      | 20B   | yes    | no      | 2020-05-16     |
| Wales/PHWC-33101/2020   | EPI_ISL_446739   | 2020-04-14 | UK      | Wales      | 20B   | yes    | no      | 2020-05-16     |
| Wales/PHWC-34267/2020   | EPI_ISL_446892   | 2020-04-18 | UK      | Wales      | 20B   | yes    | no      | 2020-05-16     |
| Wales/PHWC-34926/2020   | EPI_ISL_446995   | 2020-04-18 | UK      | Wales      | 20B   | yes    | no      | 2020-05-16     |
| Wales/PHWC-35A7D/2020   | EPI_ISL_474519   | 2020-04-25 | UK      | Wales      | 20B   | yes    | no      | 2020-06-23     |
| Wales/PHWC-369E8/2020   | EPI_ISL_474744   | 2020-04-24 | UK      | Wales      | 20B   | yes    | no      | 2020-06-23     |
| USA/CA-CZB-1320/2020    | EPI_ISL_468354   | 2020-05-20 | USA     | California | 20C   | yes    | no      | 2020-06-16     |
| USA/CA-CZB-1322/2020    | EPI_ISL_468355   | 2020-05-20 | USA     | California | 20C   | yes    | no      | 2020-06-16     |
